# Supplementary material
Source: Springer Nature journal article supplement (https://www.springermedizin.de/resource/supplementary/13058_2012_3169_MOESM3_ESM.pdf/9703428)

Chr 17 p12 p11.2 11.2 17q12 17q22 25.3

35 36 37 38(Mb)

*ERBB2*

*KRT40*

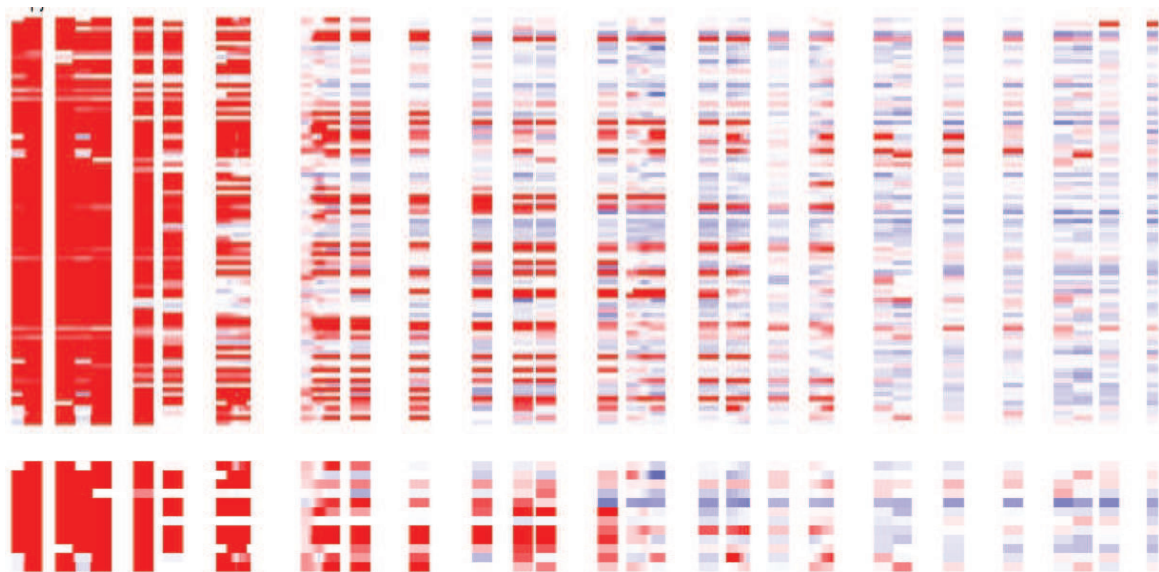

copy number

0

2.0

4.0

Supplement: MOESM3 [file 9703428]
